# Supplementary material for: Discovery of new small molecules inhibiting 67 kDa laminin receptor interaction with laminin and cancer cell invasion
Source: PubMed Central journal article supplement (PMC4627239; doi:10.18632/oncotarget.4016), 2015-05-29
Supplement: oncotarget-06-18116-s001.pdf [file oncotarget-06-18116-s001.pdf]

## SUPPLEMENTARY CHARTS

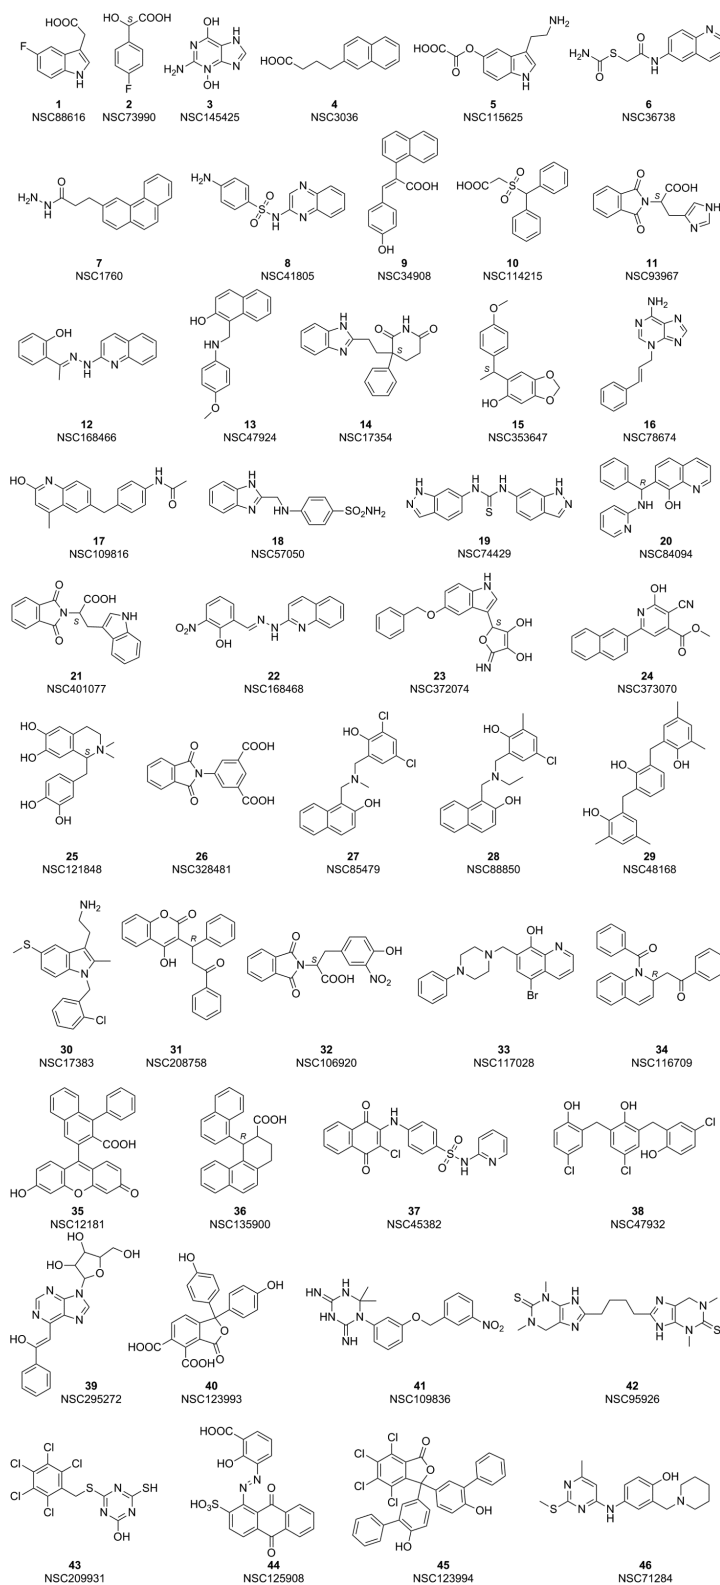

Supplementary Chart 1: SB-VS selected small molecules directed to the peptide G cavity of 67LR.

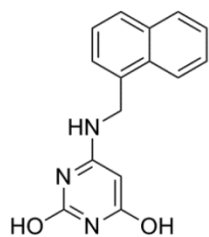

**47**  
NSC210423

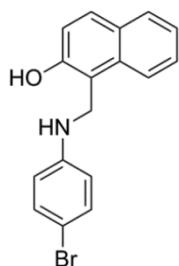

**48**  
NSC47912

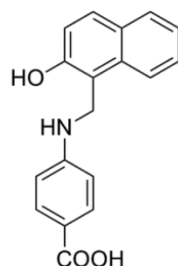

**49**  
NSC47922

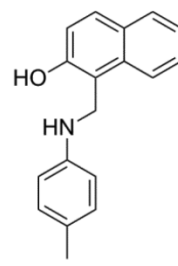

**50**  
NSC47923

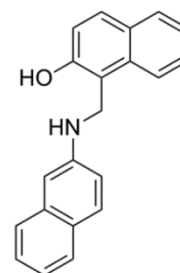

**51**  
NSC47936

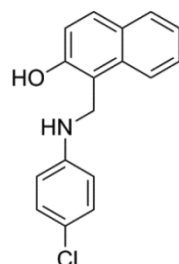

**52**  
NSC48478

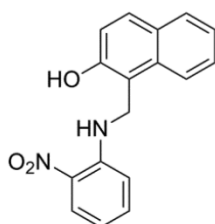

**53**  
NSC48480

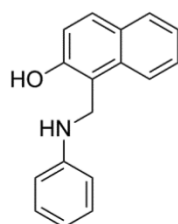

**54**  
NSC48481

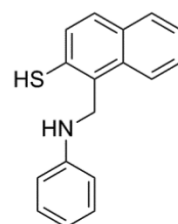

**55**  
NSC89505

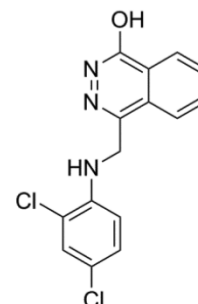

**56**  
NSC646680

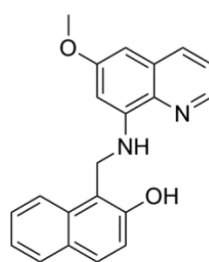

**57**  
NSC130802

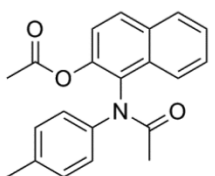

**58**  
NSC47940

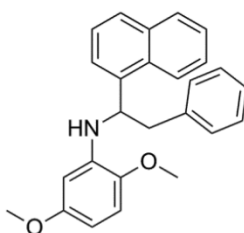

**59**  
NSC403533

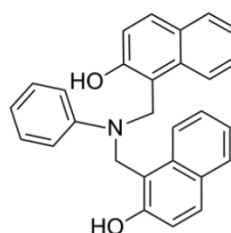

**60**  
NSC48869

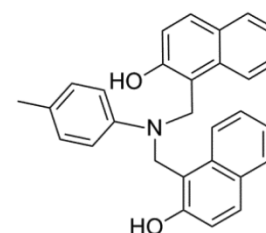

**61**  
NSC48861

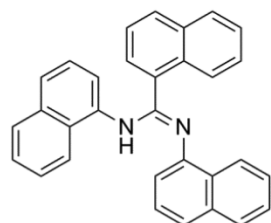

**62**  
NSC44674

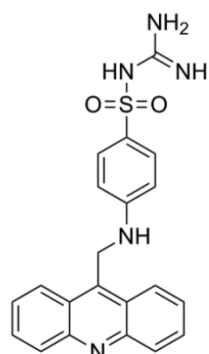

**63**  
NSC348894

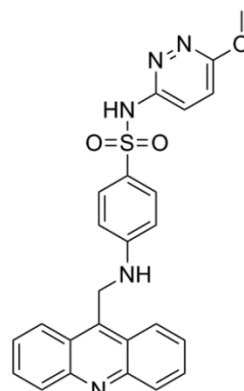

**64**  
NSC348896

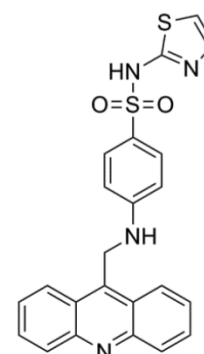

**65**  
NSC353717

Supplementary Chart 2: Refinement of lead 67LR inhibitor NSC47924.
